# Supplementary material
Source: publisher site journal article supplement (https://www.dovepress.com/article/522994)
Supplement: Supplementary file 1 [file 522994%20Supplementary%20material.docx]

**Table S1.** Primers for quantitative real-time polymerase chain reaction.

| mRab27A F | CAGGAGAGGTTTCGTAGCTTAAC |
| --- | --- |
| mRab27A R | GGCTTATCCAGTTTCGGACAT |
| mRab27B F | CGTCAGGAAAAGCGTTTAAGGT |
| mRab27B R | AGAAGCTCTGTTGACTGGTGA |
| mSMPD3 F | AGAAACCCGGTCCTCGTACT |
| mSMPD3 R | CCTGACCAGTGCCATTCTTT |
| mIL-1β F | TGGAGAGTGTGGATCCCAAG |
| mIL-1β R | GGTGCTGATGTACCAGTTGG |
| mNLRP3 F | AGATTACCCGCCCGAGAAAG |
| mNLRP3 R | TCCCAGCAAACCCATCCACT |
| mCD80 F | GGCAAGGCAGCAATACCTTA |
| mCD80 R | CTCTTTGTGCTGCTGATTCG |
| mCD86 F | GAGCGGGATAGTAACGCTGA |
| mCD86 R | GGCTCTCACTGCCTTCACTC |
| mMHC-II F | TGGTGACACTGGGACATTCATC |
| mMHC-II R | CAGTCTGTCCCCCTGCTAAG |
| mCOL1A1 F | TGGCAAAGACGGACTCAAC |
| mCOL1A1 R | GGCAGGAAGCTGAAGTCATAA |
| mCOL3A1 F | TGACTGTCCCACGTAAGCAC |
| mCOL3A1 R | GAGGGCCATAGCTGAACTGA |
| mα-SMA F | TTCGTGTGGCCCCTGAAGAGCAT |
| mα-SMA R | CCAGTTGTACGTCCAGAGGCA |
| mFN1 F | CTACGGAGAGACAGGAGGAAATAGC |
| mFN1 R | AGTGACAGCATACAGGGTGATGG |
| mCD31 F | ACGCTGGTGCTCTATGCAAG |
| mCD31 R | TCAGTTGCTGCCCATTCATCA |
| mvWF F | TGTTCATCAAATGGTGGGCAGC |
| mvWF R | ACAGACGCCATCTCCAGATTCA |
| mKDR F | ACGAGGAGAGAGGGTCATCT |
| mKDR R | GACACACTCTCCTGCTCAGT |
| mANG-1 F | CCAATCTAAATGGAATGTTCT |
| mANG-1 R | CAGAGCACCTTCAAAAGTCCA |
| mβ-actin F | GTGACGTTGACATCCGTAAAGA |
| mβ-actin R | GCCGGACTCATCGTACTCC |
| U6 | CTCGCTTCGGCAGCACA |
| miR-146a-5p | TGAGAACTGAATTCCATGGGTT |

**Table S2.** Reagentsand antibodies used in this study.

| **Production** | **Brand** | **Catalog number** | **Country** |
| --- | --- | --- | --- |
| α-MEM | Gibco | 12571500 | USA |
| FBS | Gibco | 10099 | USA |
| Penicillin/streptomycin | Gibco | 15140 | USA |
| TNF-α | Peprotech | 315-01A-20 | USA |
| 60% kcal fat | Ready Diets | D12492 | China |
| STZ | Sigma-Aldrich | S0130 | USA |
| PKH26 | Merck | PKH26PHL | Germany |
| Hematoxylin and Eosin (H&E) | Solarbio | G1120 | China |
| Masson's trichrome staining kits | Solarbio | 1340 | China |
| RNA-Quick Purification Kit | Escience | RN001 | China |
| RT Master Mix | Takara | RR036A | Japan |
| cDNA synthesis kit | Vazyme | PR111 | China |
| SYBR Green I Master Mix | Roche | 4887352001 | Switzerland |
| RIPA | Beyotime | P0013 | China |
| BCA assay kit | Invitrogen | 23227 | USA |
| PVDF membrane | Merck | ISEQ00010 | Germany |
| HRP-conjugated secondary antibodies | Proteintech | PR30011 | China |
| Immobilon Chemiluminescent HRP substrate | Merck | WBKLS0500 | Germany |
| Cell Counting Kit-8 (CCK-8) | Dojindo | CK04 | Japan |
| IL-18 ELISA Kit | Cusbio | CSB-E04609m | China |
| IL-1beta ELISA Kit | Cusbio | CSB-EP011614m | China |
| Matrigel | Corning | 356213 | USA |
| Lipofectamine 3000 system | Invitrogen | L3000015 | USA |
| Cell mask | Invitrogen | C37608 | USA |
| WGA | MKbio | MP6326 | China |
| Phalloidin | Invitrogen | P3457 | USA |
| DAPI | Abcam | ab104139 | UK |
| CD9 | Abcam | ab307085 | UK |
| TSG101 | Abcam | ab125011 | UK |
| IL-1β | Abcam | ab283818 | UK |
| Rab27A | Affinity | DF6702 | China |
| Rab27B | Affinity | DF12060 | China |
| GSDMD | Affinity | AF4012 | China |
| SMPD3 | Abclonal | A23417 | China |
| NLRP3 | Abclonal | A5652 | China |
| TXNIP | Abclonal | A9342 | China |
| β-actin | Abclonal | AC038 | China |
| Cl-GSDMD | CST | 10137 | USA |
| Cl-Caspase1 | Affinity | AF4005 | China |
| Ki67a | Affinity | AF0198 | China |
| **Production** | **Brand** | **Catalog number** | **Country** |
| α-SMA | Abclonal | A2235 | China |
| CD31 | Abclonal | A19014 | China |


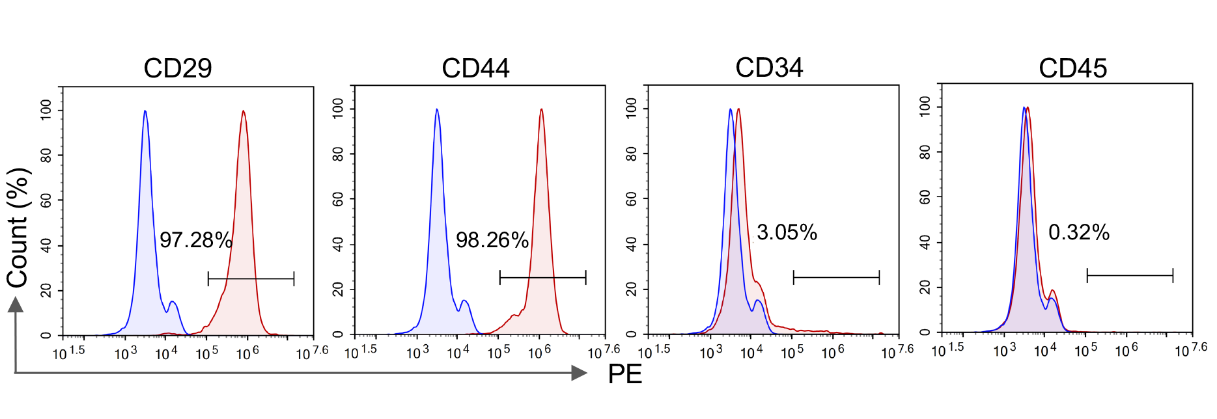


**Figure S1.** Flow cytometry analysis of ADSCs surface markers.


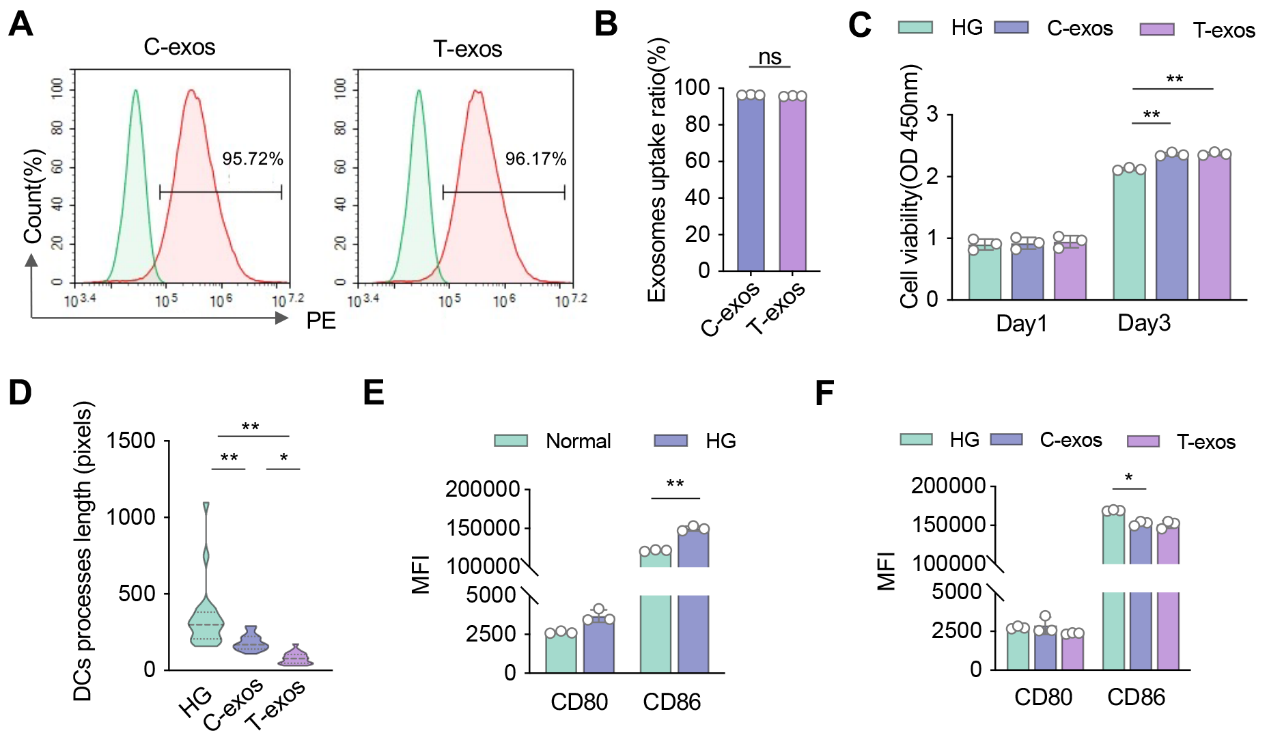


**Figure S2.** (A, B) The Flow cytometric analysis and the quantity graph show the proportion of exosome uptake after DCs co-culture with C-exos and T-exos. (C) The cell viability on different exosomes treatment in high-glucose conditions at 1 day and 3 days were detected by CCK-8. (D) Process length and branching were quantified using ImageJ from immunofluorescence images. (E) The mean fluorescence intensity (MFI) of DCs activation markers CD80 and CD86 in normal-cultured DCs and HG-cultured DCs. (F) The MFI of DCs activation markers CD80 and CD86 in DCs treated by C-exos and T-exos. Data are presented as mean ± SD (n = 3). ns, not significant. **p* < 0.05, ***p* < 0.01.


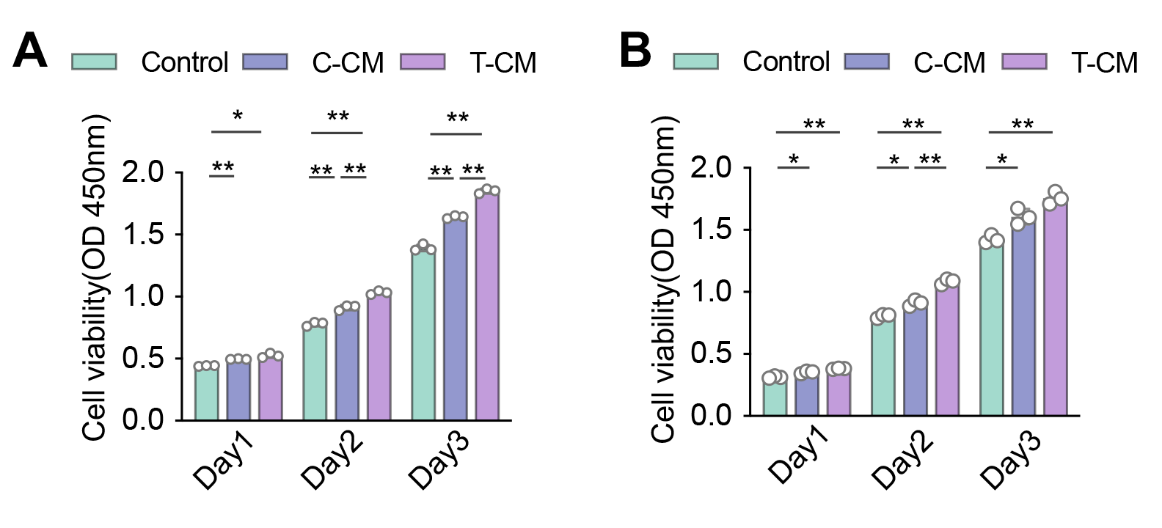


**Figure S3.** (A) The cell viability in NIH-3T3 co-cultures with different CM was measured using the CCK-8 assay at 1, 2, and 3 days. (B) The cell viability in bEnd.3 co-cultures with DCs treated with different CM was measured using the CCK-8 assay at 1, 2, and 3 days. Data are presented as mean ± SD (n = 3). **p < 0.05, **p < 0.01.*


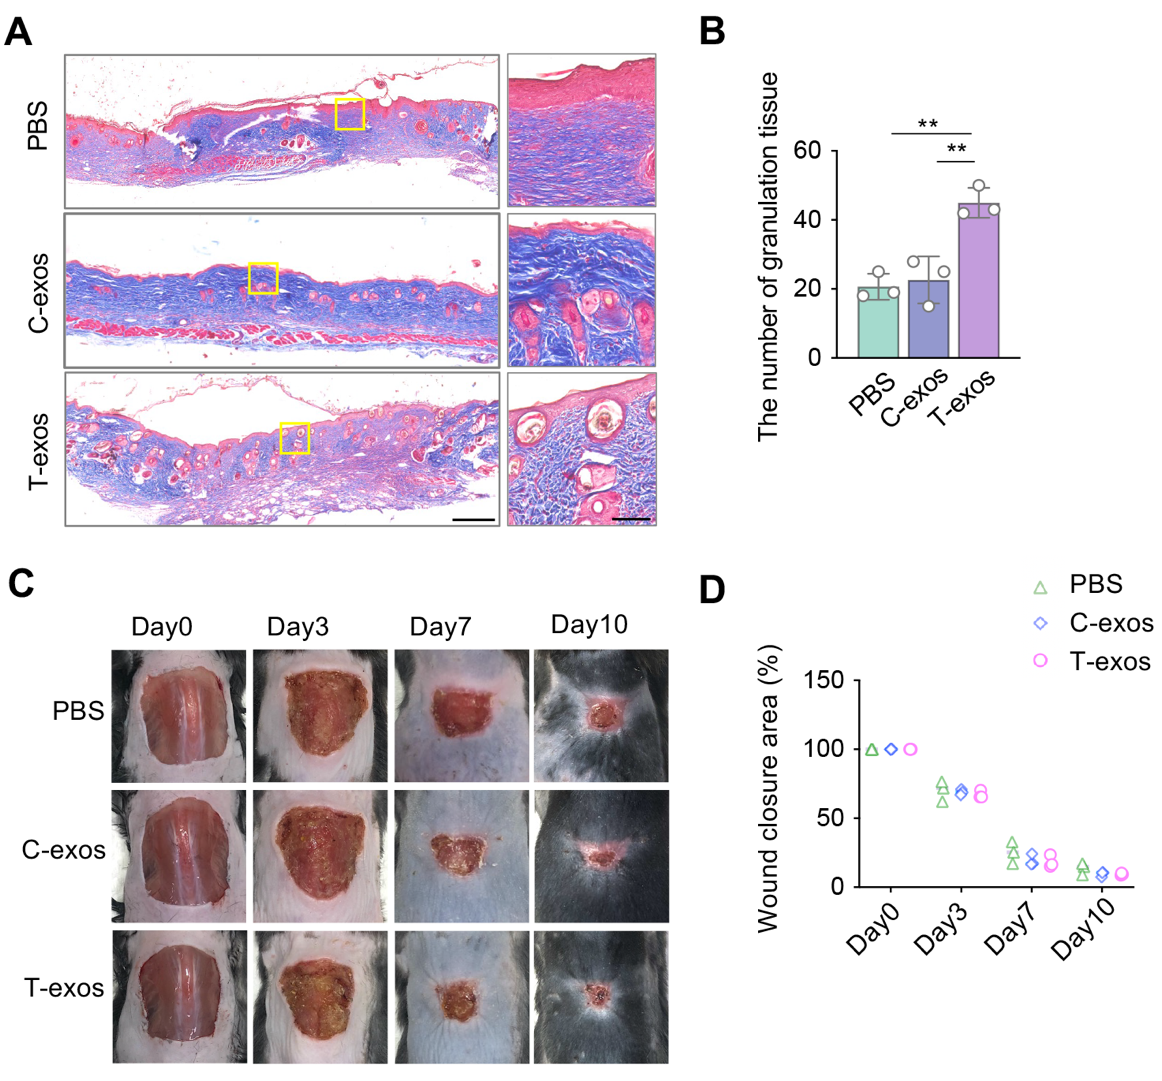


**Figure S4.** (A) Representative Masson staining images of wounds in three groups on day 14 after wound creation. The enlarged image showed new skin structures, such as the epidermis and hair follicles. Scale bars: 600 μm (left column) and 150 μm (right column). (B) The number of granulation tissue were quantified from H&E staining. (C, D) Representative images and quantification of skin wound area in non-diabetic C57BL/6 mice treated with the equal number of C-exos or T-exos. Data are presented as mean ± SD (n = 3). ns, not significant. ***p* < 0.01.


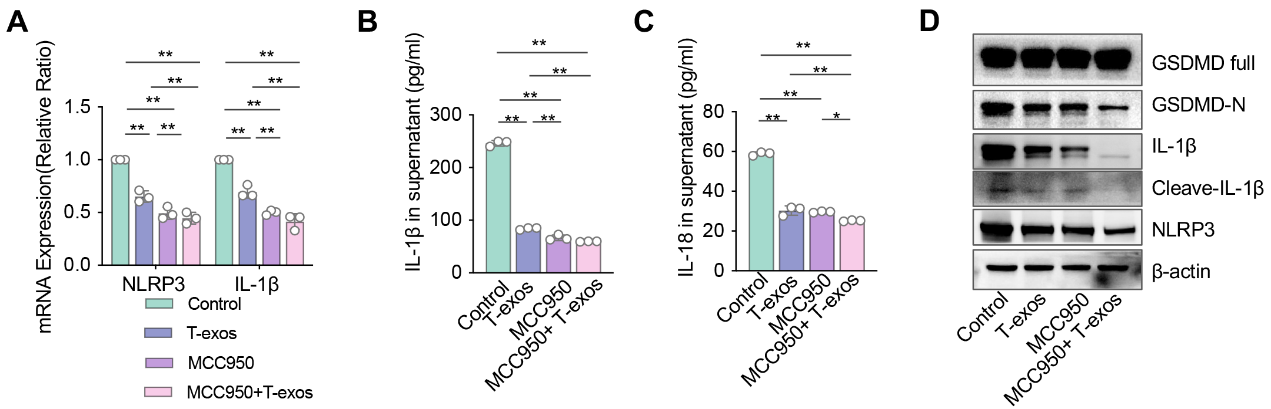


**Figure S5.** (A) The qRT-PCR analysis showed relative expression of NLRP3 and IL-1β in control, T-exos, MCC950, and MCC950 + T-exos groups. (B, C) ELISA showed the level of IL-1β and IL-18 in DCs’ serum. (D) Western blots analysis showed the expression of GSDMD full, GSDMD-N, IL-1β, Cleaved-IL-1β, NLRP3, and β-actin in control, T-exos, MCC950, and MCC950+ T-exos groups. Data are presented as mean ± SD (n = 3). ns, not significant. **p < 0.05, **p < 0.01.*


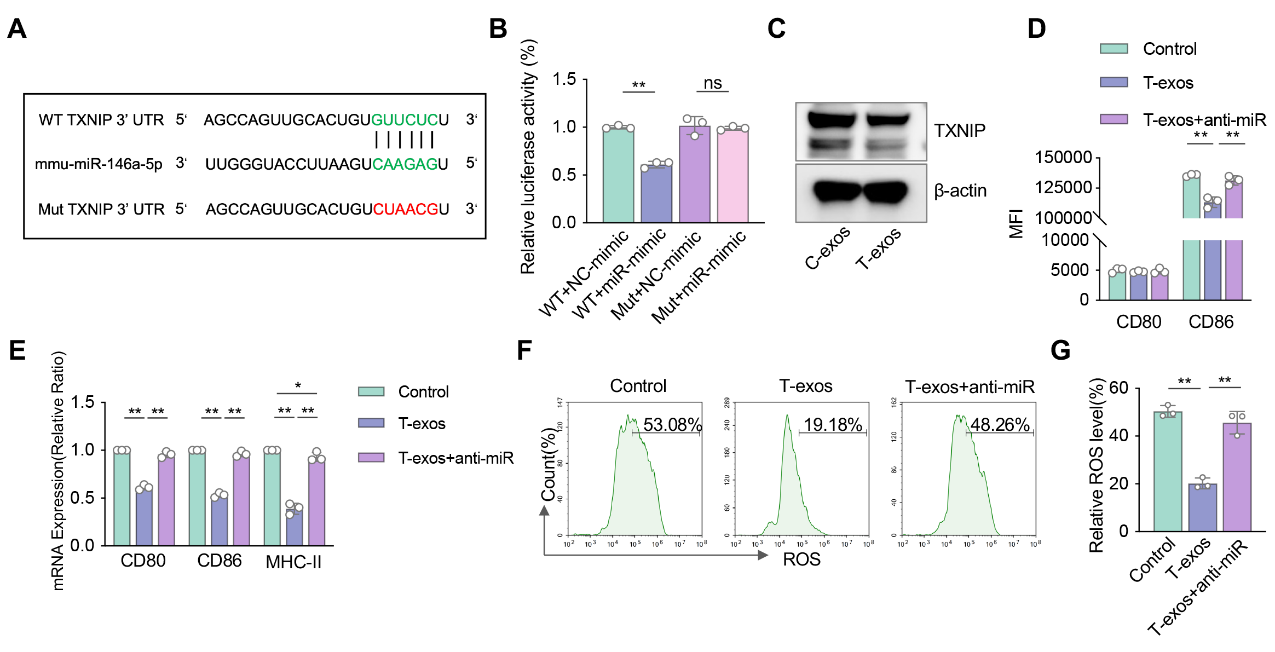


**Figure S6.** (A) The sequence alignment of wild type TXNIP (WT) with mutant TXNIP (Mut). (B) Relative luciferase activity of WT-TXNIP or Mut-TXNIP reporter in HEK293T cells after miR-146a-5p mimic treatment. (C) The protein expression of TXNIP was certified by western blots in C-exos and T-exos groups. (D) The MFI of DCs activation markers CD80 and CD86 in Controls, T-exos, and T-exos+anti-miR groups. (E) The relative gene expression levels of CD80, CD86, and MHC-II in three groups were examined by qRT-PCR. (F, G) The levels of ROS were determined by Flow cytometry analysis in Control, T-exos, and T-exos+anti-miR-146a-5p groups. Data are presented as mean ± SD (n = 3). **p < 0.05, **p < 0.01.*
